# Supplementary material
Source: PubMed Central journal article supplement (PMC7780144)
Supplement: EMBJ-40-e104273-s001.pdf [file EMBJ-40-e104273-s001.pdf]

1 **APPENDIX PDF**

2

3 **Adaptation to plant shade relies on rebalancing the transcriptional activity of**  
4 **the PIF7-HFR1 regulatory module.**

5

6 Sandi Paulišić, Wenting Qin, Harshul Arora Verasztó, Christiane Then, Benjamin  
7 Alary, Fabien Nogue, Miltos Tsiantis, Michael Hothorn, Jaime F. Martínez-García

8

9 **APPENDIX TABLE OF CONTENTS**

10 1. Appendix Figure S1.

11 2. Appendix Figure S2.

12 3. Appendix Supplementary Methods.

13 4. Appendix Table S1.

14 5. Appendix Table S2.

15 6. Appendix Table S3.

16 7. Appendix References.

17

18

19

1 **1. APPENDIX FIGURE S1.**

2

3

4

5

6

7

8

9

10

11

12

13

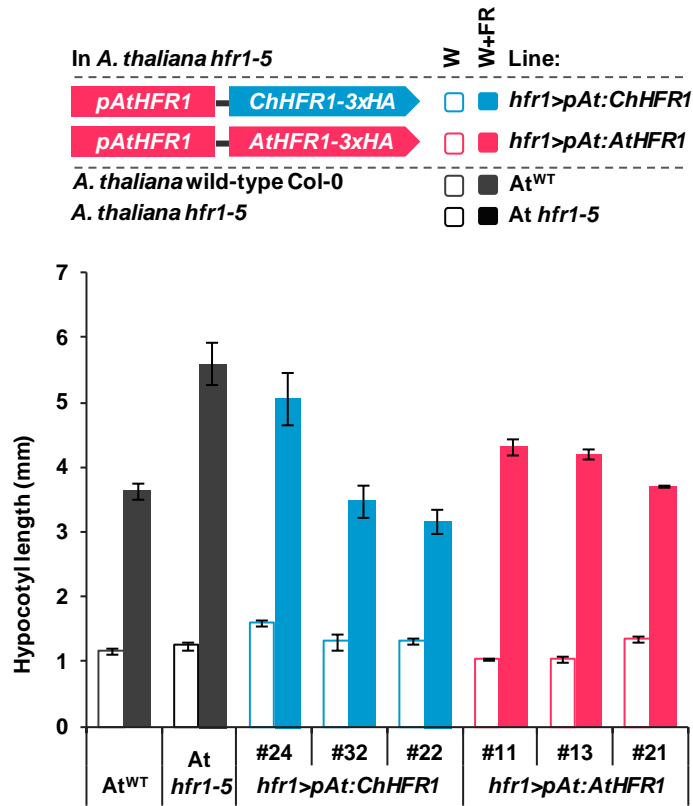

14

**Appendix Figure S1. ChHFR1 and AtHFR1 complement the *A. thaliana hfr1-5***

15

**mutant long hypocotyl phenotype.** Hypocotyl length of the shown lines grown as

16

indicated in Fig 3C. Values were used to generate data on Fig 3C.

17

1 **2. APPENDIX FIGURE S2.**

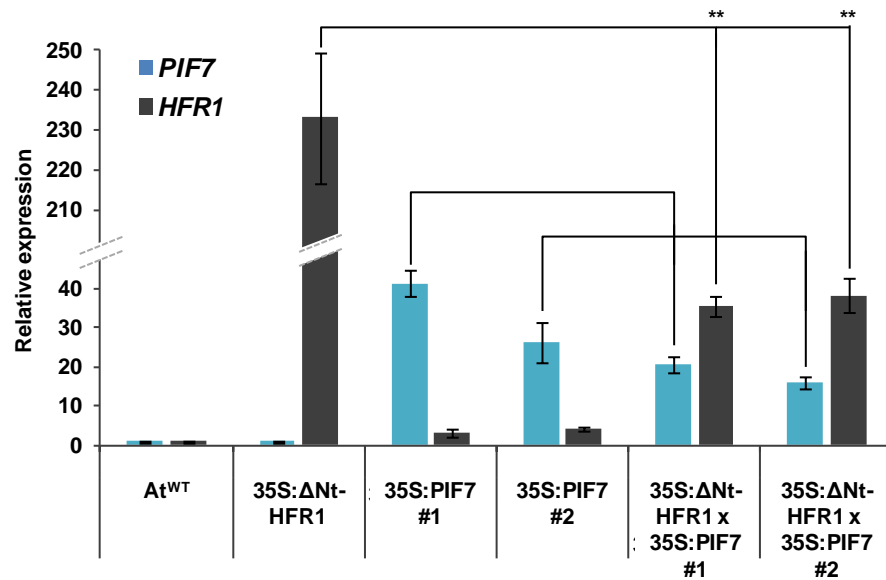

13 **Appendix Figure S2. Relative expression levels of *AtHFR1* and *AtPIF7* genes**  
 14 **in transgenic lines overexpressing *GFP-ΔNt-HFR1* and/or *PIF7-CFP*.** Relative  
 15 expression, normalized to *UBQ10*, was estimated in seedlings grown for 7 days in  
 16 W. Expression values are the mean ± SE of three independent biological replicates  
 17 relative to At<sup>WT</sup>. Asterisks mark significant differences in expression (Student *t*-test:  
 18 \*\* p-value <0.01; \* p-value <0.05) relative to 35S:*GFP-ΔNt-HFR1-GFP* or  
 19 35S:*PIF7-CFP* values.

### 3. APPENDIX SUPPLEMENTARY METHODS.

#### **Generation of RNAi-HFR1 plants of *C. hirsuta***

To generate an RNAi construct for silencing of the endogenous *ChHFR1*, a fragment of 222 bp was PCR amplified using primers CTO35 + CTO36 (Appendix Table S2) and cDNA of 7-day old *C. hirsuta* seedlings grown 1 h under W+FR. This partial fragment of *ChHFR1* (ptChHFR1) was cloned into pCRII-TOPO (Invitrogen, [www.thermofisher.com](http://www.thermofisher.com)) to generate pCT17, which was confirmed by sequencing. An *EcoRI* fragment of pCT17 was subcloned into pENTR3C vector (Invitrogen), to create the Gateway entry clone pCT19 (to have ptChHFR1 flanked with attL1 and attL2, attL1<ptChHFR1<attL2). Recombination of pCT19 with the destination vector pB7GWIWG2(I), which contains attR1 and attR2 sites, using Gateway LR Clonase II (Invitrogen), gave pCT33 (35S:attB1<RNAi-ChHFR1<attB2). This plasmid is a binary vector conferring resistance to the herbicide phosphinothricin (PPT) in plants and the antibiotic spectinomycin in bacteria. *Agrobacterium tumefaciens* strain C<sub>58</sub>C<sub>1</sub> (pGV2260) was transformed with pCT33 by electroporation and colonies were selected on solid YEB medium with rifampicin (100 µg/mL), kanamycin (25 µg/mL) and spectinomycin (100 µg/mL). Wild-type *C. hirsuta* (Ox, Ch<sup>WT</sup>) plants were transformed by floral dipping and transgenic seedlings were selected on 0.5xGM- medium (Roig-Villanova *et al*, 2006) containing 50 µg/mL PPT. Transgene in seedlings of T1 generation was verified by PCR genotyping using specific primers. Plants homozygous for the transgene were finally used for experiments.

## 1 **Isolation of *HFR1* mutants of *C. hirsuta***

2 To obtain loss-of-function mutants of *ChHFR1* in *C. hirsuta* (named as *chfr1*)  
3 we employed the CRISPR-Cas9 gene editing system (Morineau *et al*, 2017). The  
4 guide RNA targeting *ChHFR1* (gRNA<sub>ChHFR1</sub>, 5'-GTT-GAA-GAC-TGC-AGA-TTT-GT-  
5 3') was synthesized to be under the control of the *A. thaliana* *U6* promoter (pU6)  
6 sequence and flanked by the Gateway attB1 and attB2 recombination sites (IDT,  
7 <https://eu.idtdna.com/pages>) (attB1<pU6:gRNA<sub>ChHFR1</sub><attB2). This sequence was  
8 recombined with the vector pDONR207 using Gateway BP Clonase II (Invitrogen)  
9 to generate the entry vector pSP101 (attL1<pU6:gRNA<sub>ChHFR1</sub><attL2). In a  
10 recombination reaction of pSP101 with pDE-Cas9 (Fauser *et al*, 2014) using  
11 Gateway LR Clonase II, a binary vector pSP102 was created  
12 (attB1<pU6:gRNA<sub>ChHFR1</sub><attB2, Cas9). This vector, that contains the information to  
13 target *ChHFR1*, confers resistance to PPT in plants and spectinomycin in bacteria.  
14 *A. tumefaciens* strain C<sub>58</sub>C<sub>1</sub> (pGV2260) was transformed with pSP102 by  
15 electroporation and colonies were selected on solid YEB medium with antibiotics,  
16 as indicated before for pCT33. Wild-type *C. hirsuta* (Ox, Ch<sup>WT</sup>) plants were  
17 transformed by floral dipping and resistant transgenic seedlings were selected on  
18 0.5xGM- medium containing PPT (30 µg/mL). These T1 seedlings were PCR  
19 genotyped using primers MJO27 and MJO28 (Appendix Table S2) to detect the  
20 presence of the transgene. In the following T2 generation, a total of six seedlings  
21 with a *sis* phenotype from 1 independent transgenic line were selected and grown  
22 to maturity. An *HFR1* fragment of 664 bp around the gRNA<sub>ChHFR1</sub> target sequence  
23 was amplified by PCR from gDNA of each plant using primers CTO29 + CTO36  
24 (Appendix Table S2). Sequencing of these fragments indicated the presence of

1 mutations in the *ChHFR1* gene. Descendants of these plants (T3 generation) were  
2 reselected in shade and sequenced to confirm the unambiguous presence of the  
3 mutated *chfr1* alleles. In the T4 generation, seedlings sensitive to PPT (indicating  
4 the loss of T-DNA insertion) were selected, which resulted in the isolation of the  
5 *chfr1-1* and *chfr1-2* mutant allele lines (Fig EV1). The wild-type and these mutant  
6 alleles were genotyped by PCR using primers SPO104 + SPO107 (for *ChPIF7*),  
7 SPO105 + SPO107 (for *chfr1-1*) and SPO106 + SPO107 (for *chfr1-2*) (Appendix  
8 Table S2).

9

#### 10 **Generation of *A. thaliana hfr1-5* transgenic lines expressing *AtHFR1* or** 11 ***ChHFR1* under the control of different promoters**

12 We amplified a 2 kbp fragment of *AtHFR1* promoter starting immediately  
13 before the ATG of *AtHFR1* gene using gDNA of *A. thaliana* wild-type Col-0 (*At*<sup>WT</sup>)  
14 as a template and primers SPO26 + SPO27 (Appendix Table S2). This fragment  
15 was subcloned into pCRII-TOPO to generate pSP51. From the different clones  
16 analyzed, the best one was pSP51.10, with three 1 bp-deletions in the amplified  
17 region, none affecting the G-boxes, known to be necessary for PIF binding.

18 *AtHFR1* coding sequence was amplified from pJB30 (Galstyan *et al*, 2011)  
19 using primers RO25 + SPO30 (Appendix Table S2), which removed the stop codon  
20 and introduced a *XhoI* site at the N-terminal site. After subcloning this fragment into  
21 pCRII-TOPO, which gave pSP54 (*AtHFR1*), the insert was sequenced to confirm  
22 its identity. The 3xHA fragment was amplified from plasmid pEN-R2-3xHA-L3  
23 (Karimi *et al*, 2007) and primers SPO31 (which added a *SalI* site) + SPO32 (which  
24 added a *XhoI* site, Appendix Table S2). This fragment was subcloned into pCRII-

1 TOPO to generate pSP55 (3xHA), whose insert was sequenced to confirm its  
2 identity. A *Bam*HI-*Xho*I fragment of pSP54 was subcloned into pSP55 digested  
3 with *Bam*HI and *Sal*I to generate pSP57 (*AtHFR1*-3xHA). A *Bam*HI-*Xho*I fragment  
4 of pSP57 was subcloned into the same sites of pENTR3C vector which gave  
5 pSP59. This plasmid contained *AtHFR1*-3xHA, with an extra *Xba*I site in the C-  
6 terminus end, flanked with attL1 and attL2 sites (attL1<*AtHFR1*-3xHA<sup>*Xba*I</sup><attL2).  
7 *Xba*I restriction site in pSP59 was removed by filling the site with Klenow enzyme  
8 after digestion, and religation to generate pSP84 (attL1<*AtHFR1*-3xHA<attL2).  
9 Recombination of pSP84 with the binary vector pIR101 (attR1<*ccdB*<attR2)  
10 (Molina-Contreras *et al*, 2019) (using Gateway LR Clonase II) resulted in pSP88  
11 (attB1<*AtHFR1*-3xHA<attB2). An *Xba*I fragment of pSP51 was subcloned into the  
12 same site of pSP88 which gave pSP90 (*pAtHFR1*:attB1<*AtHFR1*-3xHA<attB2).  
13 This binary vector confers resistance to spectinomycin in bacteria and PPT in  
14 plants.

15 *ChHFR1* CDS was amplified using cDNA from wild-type *C. hirsuta* (Ox,  
16 Ch<sup>WT</sup>) seedlings and primers SPO28 + SPO29 (Appendix Table S2), which  
17 removed the stop codon and introduced a *Xho*I site. This PCR product was  
18 subcloned into pCRII-TOPO to generate pSP53 (*ChHFR1*). Selected colonies were  
19 sequenced to confirm their identity. A *Bam*HI-*Xho*I fragment of pSP53 was  
20 subcloned into pSP55 digested with *Bam*HI-*Sal*I to generate pSP56 (*ChHFR1*-  
21 3xHA). A *Bam*HI-*Xho*I fragment of pSP56 was subcloned into the same site of  
22 pENTR3C vector, which gave pSP58. This plasmid contained *ChHFR1*-3xHA, with  
23 an *Xba*I site in the C-terminus end, flanked with attL1 and attL2 sites  
24 (attL1<*ChHFR1*-3xHA<sup>*Xba*I</sup><attL2). *Xba*I restriction site in pSP58 was removed by

1 filling the site with Klenow enzyme after digestion, and religation to generate  
2 pSP83 (attL1<*ChHFR1-3xHA*<attL2). Recombination of pSP83 with the binary  
3 vector pIR101 using Gateway LR Clonase II resulted in pSP87 (attB1<*ChHFR1-*  
4 *3xHA*<attB2). An *Xba*I fragment of pSP51 was subcloned into the same site of  
5 pSP87 which gave pSP89 (*pAtHFR1:attB1<ChHFR1-3xHA<attB2*). This binary  
6 vector confers resistance to spectinomycin in bacteria and PPT in plants.

7 To overexpress *ChHFR1*, a *Bam*HI-*Xho*I fragment of pSP58 was subcloned  
8 into the *Bam*HI-*Sal*I digested pCAMBIA1300 based pCS14 (Sorin *et al*, 2009) to  
9 generate pSP81 (*35S:ChHFR1-3xHA*). This binary vector confers resistance to  
10 kanamycin in bacteria and hygromycin in plants.

11 *A. thaliana hfr1-5* plants were transformed with pSP81, pSP89 and pSP90,  
12 as previously described. Transgenic seedlings were selected on 0.5xGM- medium  
13 with PPT (15 µg/mL) or hygromycin (30 µg/mL), verified by PCR genotyping using  
14 specific primers. Homozygous transgenic plants with 1 T-DNA insertion were finally  
15 used for experiments.

16

### 17 **Generation of constructs for transient expression in *N. benthamiana* leaves**

18 To overexpress *ChHFR1* and *AtHFR1* in *N. benthamiana*, a Gateway vector  
19 was created using pCAMBIA1302 (*35S:mGFP5*) as a backbone. An *Nsi*I-*Hind*III  
20 fragment of pEarlyGate 100 (*35S:attR1<ccdB<attR2*) (Earley *et al*, 2006) was  
21 subcloned into pCAMBIA1302 digested with *Pst*I-*Hind*III, which gave pSP135  
22 (*35S:attR1<ccdB<attR2, 35S:mGFP5*). Recombination of pSP58 and pSP59 (both  
23 linearized with *Nhe*I) with the binary vector pSP135 using Gateway LR Clonase II  
24 gave pSP141 (*35S:attB1<ChHFR1-3xHA<attB2, 35S:mGFP5*) and pSP142



1 (35S:attB1<AtHFR1-3xHA<attB2, 35S:mGFP5), respectively. These two binary  
2 vectors also overexpress mGFP5 and confer resistance to kanamycin in bacteria.

3 To generate constructs overexpressing *ChHFR1* and *AtHFR1* with the  
4 COP1 binding domains exchanged (Fig 5C), we employed a PCR-based  
5 mutagenesis. Using pSP90 as a template, a fragment of 205 bp was amplified with  
6 RO25 and SPO126 primers, and a larger fragment of 821 bp was amplified using  
7 SPO127 and SPO32 primers. Both PCR fragments were used to amplify *AtHFR1*  
8 with the COP1 binding domain from *ChHFR1* (named in here as *AtHFR1\**). The  
9 resulting fragment was subcloned into pCR8/GW/TOPO (Invitrogen) to generate  
10 pSP130, which was confirmed by sequencing. Using pSP89 as a template, a  
11 fragment of 291 bp was amplified with SPO28 and SPO128 primers, and a  
12 fragment of 800 bp was amplified using SPO129 and SPO32. Both PCR fragments  
13 were used to amplify *ChHFR1* with the COP1 binding domain from *AtHFR1*  
14 (named in here as *ChHFR1\**). The resulting fragment was subcloned into  
15 pCR8/GW/TOPO to generate pSP131, which was confirmed by sequencing.  
16 Recombination of pSP130 and pSP131 with the binary vector pSP135 using  
17 Gateway LR Clonase II gave pSP132 (35S:attB1<*AtHFR1\**-3xHA<attB2,  
18 35S:mGFP5) and pSP133 (35S:attB1<*ChHFR1\**-3xHA<attB2, 35S:mGFP5),  
19 respectively. Both vectors also overexpress mGFP5 and confer resistance to  
20 kanamycin in bacteria.

21 *N. benthamiana* plants were agroinfiltrated with the *A. tumefaciens* (strain  
22 GV3101) transformed with pSP141, pSP142, pSP132 or pSP133, and the same  
23 strain expressing the HcPro protein (Vilela *et al*, 2013) and kept in the greenhouse  
24 under long-day photoperiods. Samples were taken 3 days after agroinfiltration.

1

## 2 **Generation of constructs for the Yeast 2 Hybrid (Y2H) assays**

3 *AtPIF7* CDS was amplified using cDNA of *A. thaliana* wild-type Col-0 ( $At^{WT}$ )  
4 seedlings and primers JO414 + JO415 (Appendix Table S2), which removed the  
5 STOP codon and introduced a *XhoI* site. This PCR product was subcloned into  
6 pCRII-TOPO to generate pRA1 (*AtPIF7*). The insert was sequenced to confirm its  
7 identity. A *XhoI* fragment of pRA1 was subcloned into pSP55 digested with *SalI* to  
8 generate pRA2 (*AtPIF7-3xHA*). An *EcoRI* fragment of pRA2 was subcloned into  
9 the same site of pENTR3C entry vector which gave pRA3 (*attL1<AtPIF7-*  
10 *3xHA<attL2*). This PIF7-3xHA had a stop codon immediately before the ATG,  
11 which prevented from cloning it in frame with the yeast derived proteins. Therefore,  
12 the *PIF7-3xHA* gene was PCR amplified using pRA3 as a DNA template and  
13 primers BAO4 + BAO5 (Appendix Table S2) to add *attB1* and *attB2* sequences  
14 (*attB1<AtPIF7-3xHA<attB2*). This fragment was recombined with pDONR207 using  
15 Gateway BP Clonase II to obtain pBA7 (*attL1<AtPIF7-3xHA<attL2*). The insert was  
16 sequenced to confirm its identity. In a recombination reaction of pBA7 and  
17 pGBKT7-GW (Chini *et al*, 2009) which contained the Gal4 DNA-binding domain  
18 (BD, *attR1<ccdB<attL2*; it confers Trp auxotrophy), and pBA7 and pGADT7-GW  
19 (Chini *et al*, 2009) which contained the Gal4 activation domain (AD,  
20 *attR1<ccdB<attL2*; it confers Leu auxotrophy), using Gateway LR Clonase II, pBA10  
21 (BD-*attB1<AtPIF7-3xHA<attB2*) and pBA11 (AD-*attB1<AtPIF7-3xHA<attB2*) were  
22 obtained. These plasmids allowed expressing the fusion BD-PIF7-3xHA or AD-  
23 PIF7-3xHA proteins under the *ADH1* promoter in yeast, respectively.

24

## 1 **Protein expression and purification for the MST experiments**

2 Sf9 cells were cultured in HyClone SFX-Insect Cell Culture Media. The  
3 codon optimized COP1 gene (residues 349-765 corresponding to the WD40  
4 domain) for expression in Sf9 cells, was PCR amplified and cloned into a modified  
5 pFastBac (Geneva Biotech) insect cell expression vector using Gibson assembly  
6 (Gibson *et al*, 2009). The final construct contained a tandem N-terminal His10-  
7 Twin-Strep-tags, a TEV (tobacco etch virus protease) cleavage site prior to COP1  
8 WD40 coding sequence in the pFastBac vector. This construct was transformed  
9 into DH10MultiBac cells (Geneva Biotech). White colonies, implying successful  
10 recombination, were selected and bacmids were purified by the alkaline lysis  
11 method. Sf9 cells were transfected with the bacmid using Profectin (AB Vector).  
12 eYFP-positive cells (P0) were observed after 1 week and subjected to two rounds  
13 of viral amplification. Sf9 cells at a density of  $1-2 \times 10^6$  cells·ml<sup>-1</sup> were infected with  
14 amplified P2 virus at a Multiplicity of infection (MOI) between 2 to 3. Infected Sf9  
15 cells were grown for 72 h at 28°C and 110 rpm. The cell pellet was then harvested  
16 by centrifugation at 2000 x g for 15 min, pellets were flash frozen and stored at –  
17 20°C.

18 Pellets from one liter of Sf9 cell culture were dissolved in 25 ml of buffer A  
19 (20 mM HEPES pH 7.5, 300 mM NaCl, 2 mM β-ME), supplemented with 10% [v/v]  
20 glycerol, a pinch of DNase, and 1 Roche cOmplete™ protease inhibitor tablet.  
21 Dissolved pellets were lysed by sonication and centrifuged at 60,000 x g for 45  
22 minutes at 4°C. The supernatant was consecutively filtered through 2-µm 1-µm and  
23 0.45-µm filters prior to loading onto Ni<sup>2+</sup>-affinity column (HisTrap excel, GE  
24 Healthcare). After the loading, Ni<sup>2+</sup>-affinity column was washed with buffer A and

1 eluted directly onto a coupled Strep-Tactin Superflow XT column (IBA) using buffer  
2 B (20 mM HEPES pH 7.5, 500 mM NaCl, 500 mM imidazole, 2 mM  $\beta$ -ME). The  
3 Strep-Tactin column was washed with buffer A and COP1 was eluted with 1x  
4 Buffer BXT (IBA) supplemented with 2 mM  $\beta$ -ME. It was cleaved overnight at 4°C  
5 with TEV protease and subsequently purified from the protease and affinity tag by  
6 a second Ni<sup>2+</sup> affinity column. COP1 WD40 was concentrated to 10  $\mu$ M and was  
7 labeled immediately.

8

### 9 **GUS lines**

10 Transgenic lines expressing GUS were based on a modified pIR101 plasmid  
11 (Molina-Contreras *et al*, 2019) which contains the reporter *GUS* gene in a  
12 promoterless context (attB1<*GUS*<attB2). *Xba*I fragment of pSP51 was subcloned  
13 into the same site of modified pIR101 to give pSP86 (*pAtHFR1*:attB1<*GUS*<attB2).  
14 This binary vector confers resistance to spectinomycin in bacteria and PPT in  
15 plants. *A. thaliana* wild-type Col-0 (At<sup>WT</sup>) plants were transformed with this  
16 construct as described previously.

17

### 18 **GUS staining**

19 Histochemical GUS assays were done as described (Roig-Villanova *et al*,  
20 2006), incubating seedlings at 37°C without ferricyanide/ferrocyanide.

21

22

23

1 **4. APPENDIX TABLE S1. Primers used for gene expression analyses.** Primers  
2 BO40 and BO41 for amplifying *UBQ10* (Sorin *et al*, 2009), SPO102 and SPO103  
3 (*AtEF1 $\alpha$*  and *ChEF1 $\alpha$* ), SPO113 and SPO114 (*AtSPC25* and *ChSPC25*), and  
4 SPO115 and SPO116 (*AtYLS8* and *ChYLS8*) have been described before (Molina-  
5 Contreras *et al*, 2019).

6

| Gene                            | Primer name | Sequence (5' – 3')     |
|---------------------------------|-------------|------------------------|
| <i>ChEF1<math>\alpha</math></i> | CTO9 (F)    | GGCCGATTGTGCTGTCCTTA   |
|                                 | CTO10 (R)   | TCACGGGTCTGACCATCCTTA  |
| <i>ChHFR1</i>                   | CTO13 (F)   | CGGCGTCGTGTCCAGATC     |
|                                 | CTO14 (R)   | TGAACCTTTTCGCGTCAGTG   |
| <i>ChPIL1</i>                   | CTO17 (F)   | GAAGACCCCAAACAACGGTT   |
|                                 | CTO18 (R)   | CCCTCATCGTACTCGGTCTCA  |
| <i>ChYUC8</i>                   | CTO51 (F)   | TTACGCCGGGAAAAAAGTTCT  |
|                                 | CTO52 (R)   | GCGAAATGGTTGGCTAGGTC   |
| <i>ChXTR7</i>                   | CTO69 (F)   | TGGTGTTCTTTCCCAAAAAA   |
|                                 | CTO70 (R)   | CCACCTCTCGTAGCCCAATC   |
| <i>AtHFR1, ChHFR1</i>           | SPO88 (F)   | CCAGCTTCTTCTCCTCA      |
|                                 | SPO89 (R)   | CATCGCATGGGAAGAAAAATC  |
| <i>AtPIF4, ChPIF4</i>           | SPO108 (F)  | CCAATACCCTCCAGATGAAGAC |
|                                 | SPO109 (R)  | TCTCTGAGGTTGGTCTCTGG   |
| <i>AtPIF5, ChPIF5</i>           | SPO110 (F)  | CATTAATCAGATGGCTATGCA  |
|                                 | SPO111 (R)  | AACTGTACCGGGTTTTGACA   |
| <i>AtPIF7, ChPIF7</i>           | SPO112 (F)  | TCCGCTCTGGATCGGAAACTC  |
|                                 | SPO64 (R)   | TGCTCGTCCCCGTCGTCCAT   |
|                                 | SPO142 (R)  | TCTCATCCTCTGGTTTATCC   |

7

8

1 **5. APPENDIX TABLE S2. Primers used for cloning or/and genotyping.** Primer

2 RO25 (Roig-Villanova *et al*, 2007) has been described before.

3

| Gene                             | Primer name | Sequence (5' – 3')                                               |
|----------------------------------|-------------|------------------------------------------------------------------|
| <i>ChHFR1</i> WT                 | SPO104 (F)  | CTGTTGAAGACTGCAGATTTG                                            |
|                                  | SPO107 (R)  | CCTAAGGCAAGATTCTTTGAA                                            |
| <i>chfr1-1</i><br><i>chfr1-2</i> | SPO105 (F)  | CTGTTGAAGACTGCAGATTA                                             |
|                                  | SPO106 (F)  | CTGTTGAAGACTGCAGATTTT                                            |
| attB1<br>attB2                   | MJO27 (F)   | GGGACAAGTTTGTACAAAAAAGCAGGCT                                     |
|                                  | MJO28 (R)   | GGGACCACTTTGTACAAGAAAGCTGGGT                                     |
| <i>pAtHFR1</i>                   | SPO26 (F)   | GCTCTAGAGTAAAGATAACGTTCT                                         |
|                                  | SPO27 (R)   | GCTCTAGAGTTAGTTAAAGAGATA                                         |
| <i>ChHFR1</i>                    | SPO28 (F)   | CCATGGGTTTTCCATTTTCTCG                                           |
|                                  | SPO29 (R)   | GGCTCGAGGAGTCTTCCCATCGCA                                         |
| <i>ChHFR1</i>                    | CTO29 (F)   | ATGATCATCATCAAATTGTTCT                                           |
| <i>AtHFR1</i>                    | RO25 (F)    | AACATGTCGAATAATCAAGCTTTTCATG                                     |
|                                  | SPO30 (R)   | GGCTCGAGTAGTCTTCTCATCGCA                                         |
| 3xHA                             | SPO31 (F)   | CCGTCGACGGTGGAGGCGGTTTCAG                                        |
|                                  | SPO32 (R)   | GGCTCGAGTCAAGCGTAATCTGGA                                         |
| RNAi- <i>ChHFR1</i>              | CTO35 (F)   | CAAACACATAATGATCATCATC                                           |
|                                  | CTO36 (R)   | ATCACTCCAGATCTGGACACGA                                           |
| <i>ChHFR1</i> *                  | SPO128 (R)  | CTTCTTTATGAATCTCTGGAACAATCTGAAGA<br>TAATTATCTGTTTGATCATGACCAAAA  |
|                                  | SPO129 (F)  | GTTCCAGAGATTCATAAAGAAGTAGAAAATGC<br>GAAGGAGGATTTGTTGGTTGTTGTC    |
| <i>AtHFR1</i> *                  | SPO126 (R)  | CTTTCTGAATCTCTGGAACAATTTGATGATGA<br>TCATTATGAGTTTGATCATGATCAAAG  |
|                                  | SPO127 (F)  | GTTCCAGAGATTCAGAAAGAAGAACGACTGTT<br>GAAGACTGCAGATTTATTGGTTGTTGTC |
| <i>AtPIF7</i>                    | JO414 (F)   | TAACACATGTCGAATTATGGAG                                           |
|                                  | JO415 (R)   | GGCTCGAGATCTCTTTTCTCATGATTC                                      |
| <i>AtPIF7</i> + attB1            | BAO4 (F)    | GGGACAAGTTTGTACAAAAAAGCAGGCTAC<br>ATGTCGAATTATGGAGTTAAAG         |
| <i>AtPIF7</i> + attB2            | BAO5 (R)    | GGGACCACTTTGTACAAGAAAGCTGGGTGT<br>CAAGCGTAATCTGGAACGTC           |

4

5

1 **6. APPENDIX TABLE S3. Synthetic peptides used for microscale**  
2 **thermophoresis (MST) experiments.** The peptides were acetylated (Ac) at the N-  
3 terminal and aminated (-NH<sub>2</sub>) at the C-terminal. The C-terminal tyrosine (Y)  
4 residue was added to quantify peptide concentrations via absorbance at 280 nm.

5

| <b>Name</b>  | <b>Sequence</b>               | <b>Company</b>               |
|--------------|-------------------------------|------------------------------|
| AtHFR1 VP    | Ac-YLQIVPEI-NH <sub>2</sub>   | Genescript                   |
| ChHFR1 VP    | Ac-HHQIVPEIY-NH <sub>2</sub>  | Genescript                   |
| At/ChHFR1 VP | Ac-LLVVVPDEY-NH <sub>2</sub>  | Genescript                   |
| AtCRY1       | Ac-EDQMVPSITY-NH <sub>2</sub> | Peptide Synthesis Laboratory |
| HsTRIB1      | Ac-SDQIVPEY-NH <sub>2</sub>   | Peptide Synthesis Laboratory |

6

7

## 8 **7. APPENDIX REFERENCES**

9

- 10 Chini A, Fonseca S, Chico JM, Fernandez-Calvo P, Solano R (2009) The ZIM  
11 domain mediates homo- and heteromeric interactions between Arabidopsis  
12 JAZ proteins. *Plant J* **59**: 77-87
- 13 Earley KW, Haag JR, Pontes O, Opper K, Juehne T, Song K, Pikaard CS (2006)  
14 Gateway-compatible vectors for plant functional genomics and proteomics.  
15 *Plant J* **45**: 616-629
- 16 Fauser F, Schiml S, Puchta H (2014) Both CRISPR/Cas-based nucleases and  
17 nickases can be used efficiently for genome engineering in Arabidopsis  
18 thaliana. *Plant J* **79**: 348-359
- 19 Galstyan A, Cifuentes-Esquivel N, Bou-Torrent J, Martinez-Garcia JF (2011) The  
20 shade avoidance syndrome in Arabidopsis: a fundamental role for atypical

1 basic helix-loop-helix proteins as transcriptional cofactors. *Plant J* **66**: 258-  
2 267

3 Gibson DG, Young L, Chuang RY, Venter JC, Hutchison CA, 3rd, Smith HO (2009)  
4 Enzymatic assembly of DNA molecules up to several hundred kilobases.  
5 *Nat Methods* **6**: 343-345

6 Karimi M, Depicker A, Hilson P (2007) Recombinational cloning with plant gateway  
7 vectors. *Plant Physiol* **145**: 1144-1154

8 Molina-Contreras MJ, Paulisic S, Then C, Moreno-Romero J, Pastor-Andreu P,  
9 Morelli L, Roig-Villanova I, Jenkins H, Hallab A, Gan X *et al* (2019)  
10 Photoreceptor Activity Contributes to Contrasting Responses to Shade in  
11 Cardamine and Arabidopsis Seedlings. *Plant Cell* **31**: 2649-2663

12 Morineau C, Bellec Y, Tellier F, Gissot L, Kelemen Z, Nogue F, Faure JD (2017)  
13 Selective gene dosage by CRISPR-Cas9 genome editing in hexaploid  
14 *Camelina sativa*. *Plant Biotechnol J* **15**: 729-739

15 Roig-Villanova I, Bou-Torrent J, Galstyan A, Carretero-Paulet L, Portoles S,  
16 Rodriguez-Concepcion M, Martinez-Garcia JF (2007) Interaction of shade  
17 avoidance and auxin responses: a role for two novel atypical bHLH proteins.  
18 *The EMBO Journal* **26**: 4756-4767

19 Roig-Villanova I, Bou J, Sorin C, Devlin PF, Martinez-Garcia JF (2006)  
20 Identification of primary target genes of phytochrome signaling. Early  
21 transcriptional control during shade avoidance responses in Arabidopsis.  
22 *Plant Physiol* **141**: 85-96



1 Sorin C, Salla-Martret M, Bou-Torrent J, Roig-Villanova I, Martinez-Garcia JF  
2 (2009) ATHB4, a regulator of shade avoidance, modulates hormone  
3 response in Arabidopsis seedlings. *The Plant Journal* **59**: 266-277

4 Vilela B, Moreno-Cortes A, Rabissi A, Leung J, Pages M, Lumbreras V (2013) The  
5 maize OST1 kinase homolog phosphorylates and regulates the maize  
6 SNAC1-type transcription factor. *PLoS One* **8**: e58105

7
