# Supplementary material
Source: PubMed Central journal article supplement (PMC7780144)

# Source data for Figure 3D

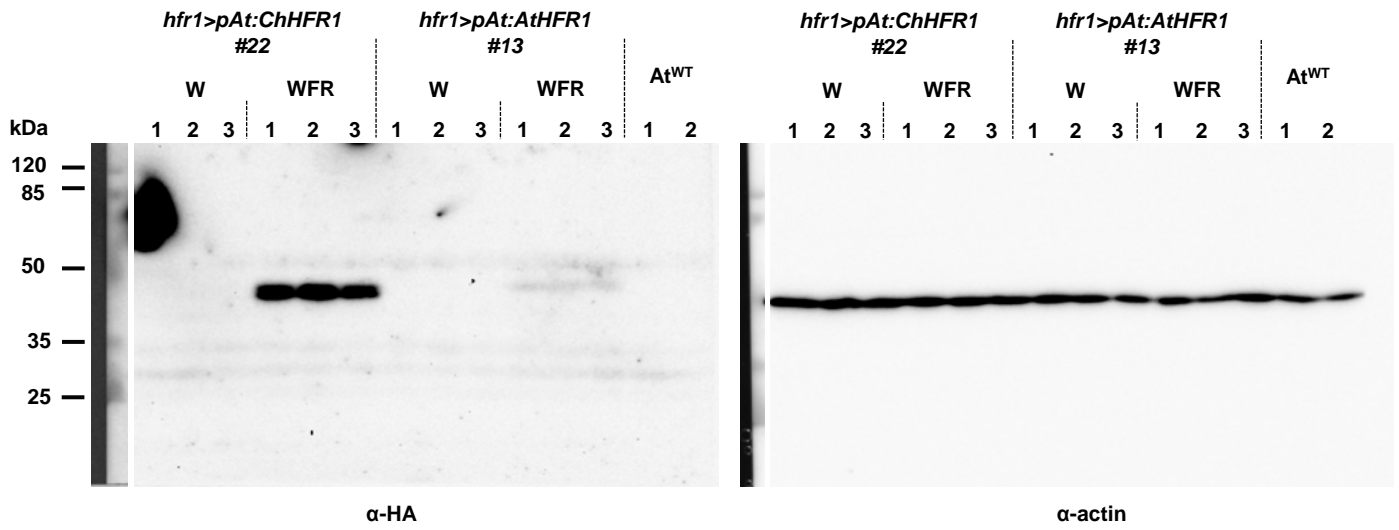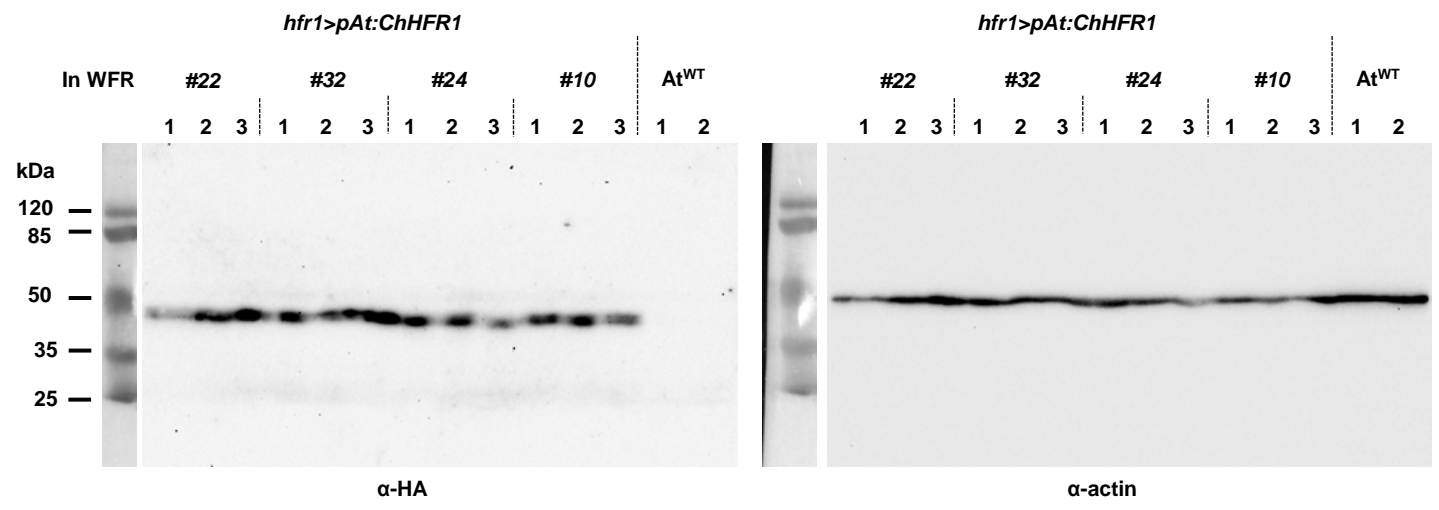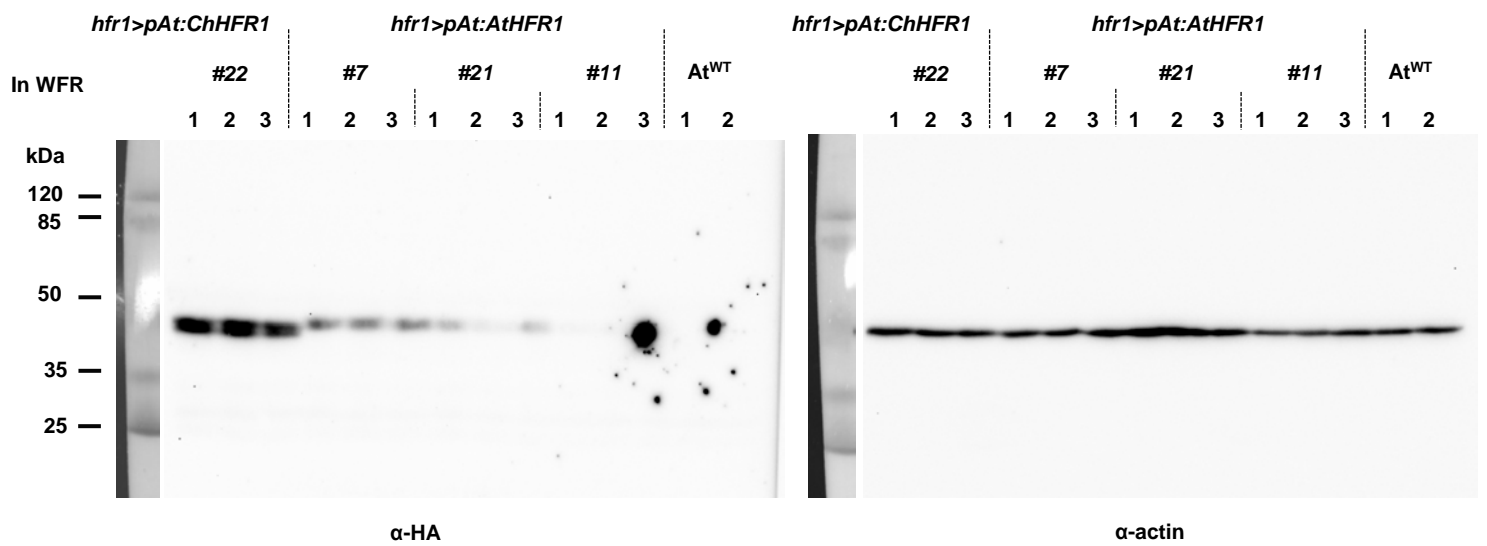

Supplement: EMBJ-40-e104273-s003.pdf [file EMBJ-40-e104273-s003.pdf]

# Source Data for Figure 4

**A**

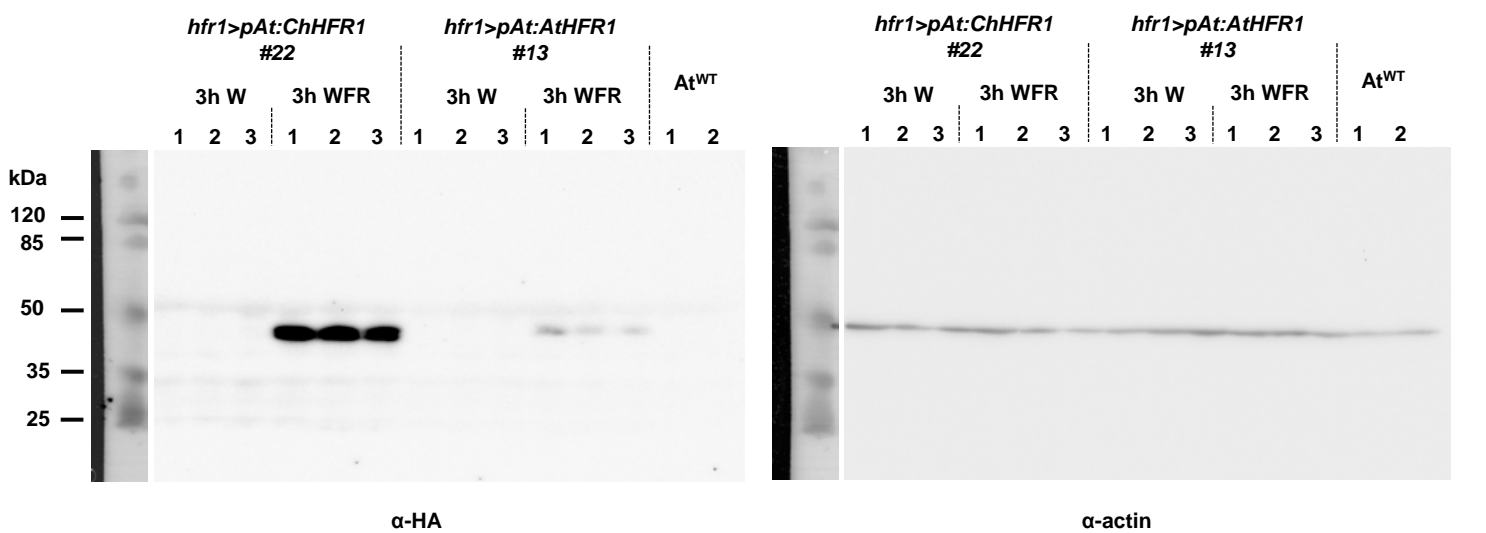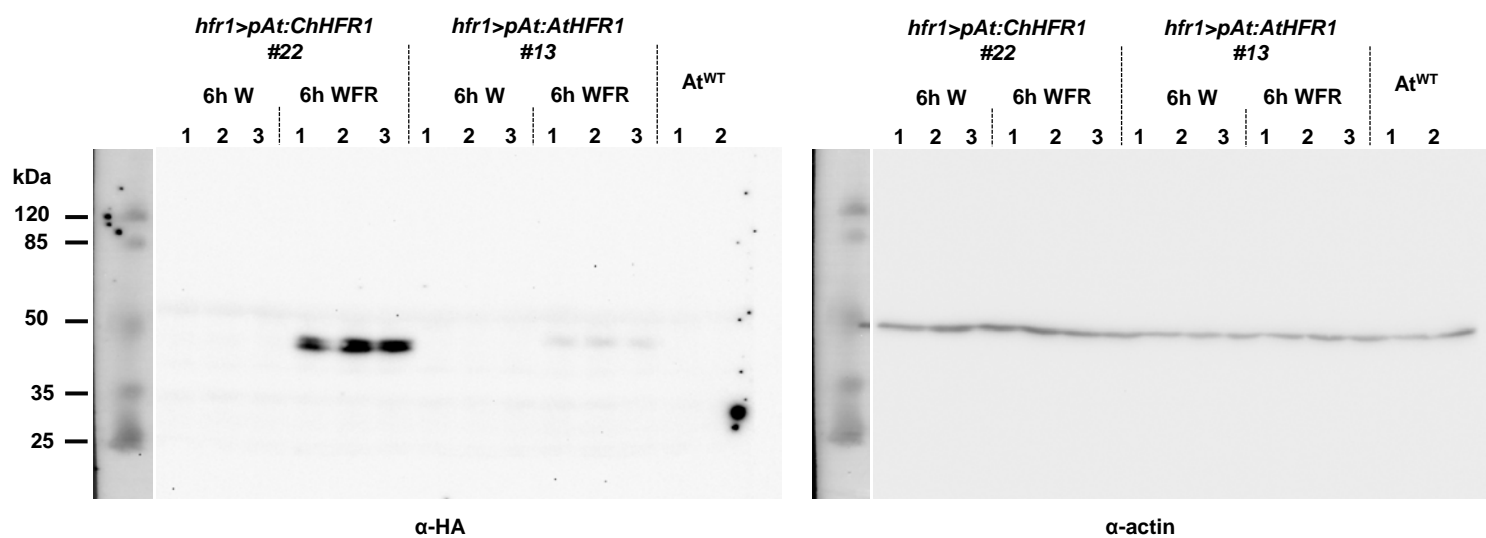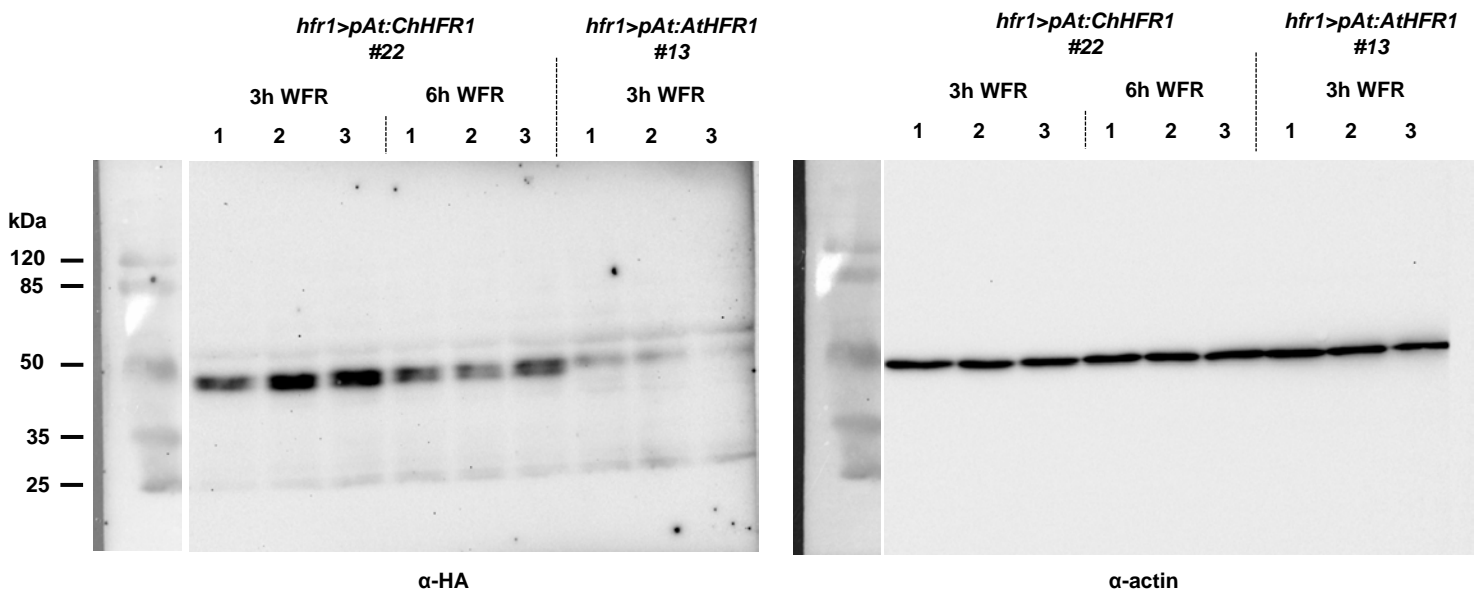

# Source Data for Figure 4

## C

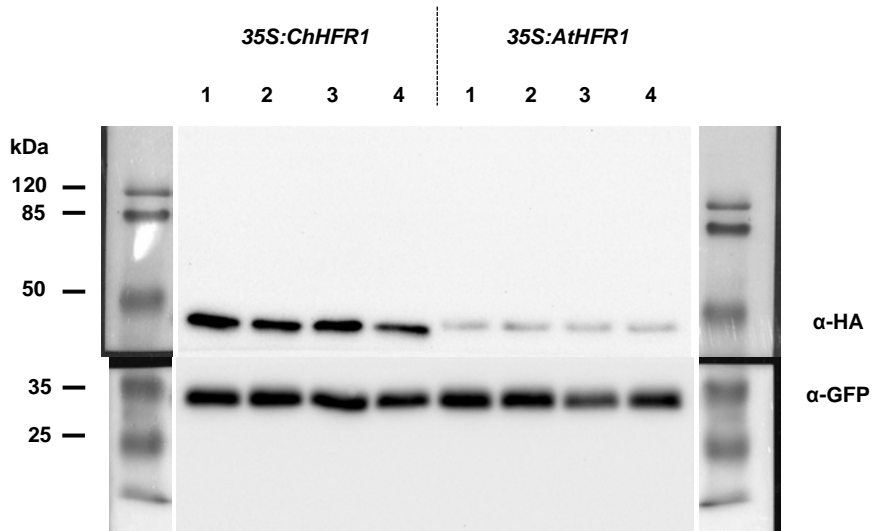

## D

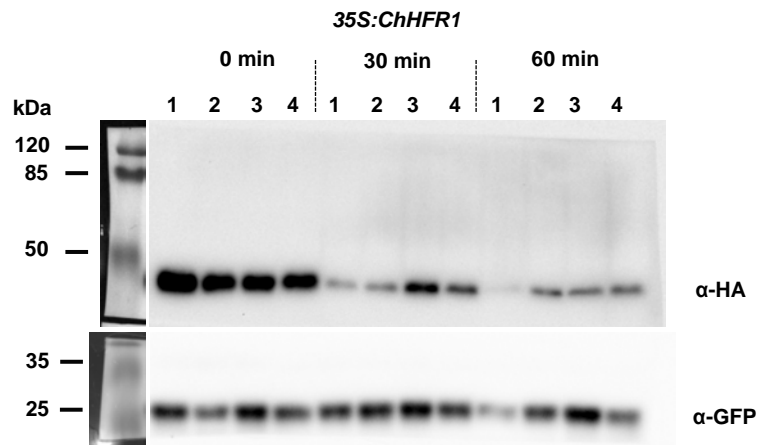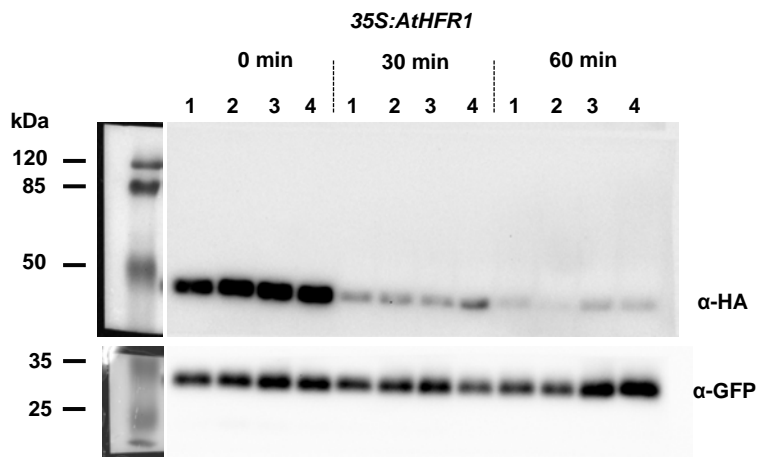

Supplement: EMBJ-40-e104273-s004.pdf [file EMBJ-40-e104273-s004.pdf]

# Source Data for Figure 5D

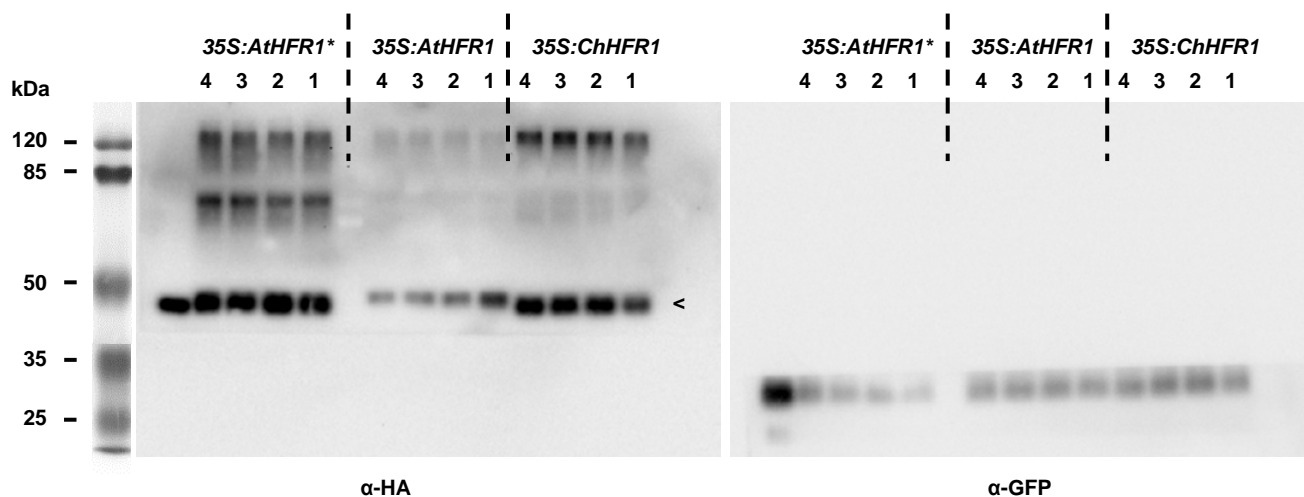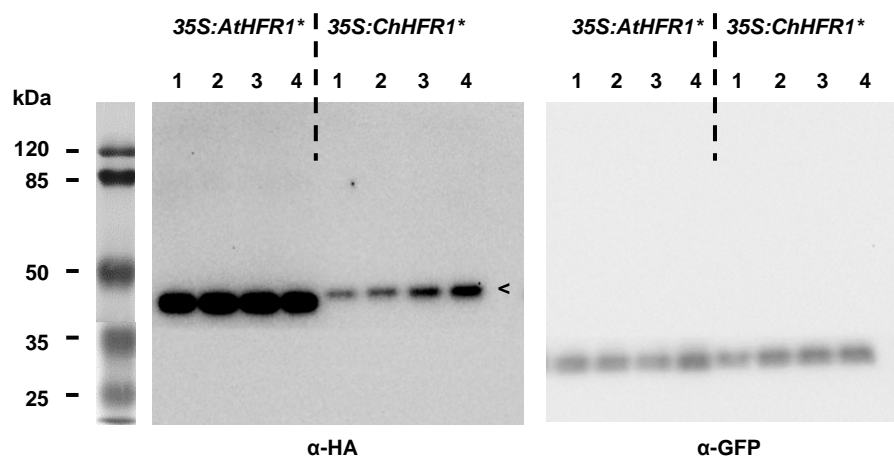

Supplement: EMBJ-40-e104273-s005.pdf [file EMBJ-40-e104273-s005.pdf]
